# Supplementary material for: Dissipative particle dynamics simulations on the self-assembly of rod-coil asymmetric diblock molecular brushes bearing responsive side chains
Source: Royal Society of Chemistry journal article supplement (doi:10.1039/d4sm01232a), 2024-12-03
Supplement: d4sm01232a1.pdf [file d4sm01232a1.pdf]

## Supplementary Information for

# Dissipative Particle Dynamics Simulations on the Self-Assembly of Rod-Coil Asymmetric Diblock Molecular Brushes Bearing Responsive Side Chains

Hao Zhu,<sup>‡</sup> Weisheng Feng,<sup>‡</sup> Yueyao Wang, Zhengyi Li, Binbin Xu\* and Shaoliang Lin\*

Shanghai Key Laboratory of Advanced Polymeric Materials, Key Laboratory for Ultrafine Materials of Ministry of Education, Frontiers Science Center for Materiobiology and Dynamic Chemistry, School of Materials Science and Engineering, East China University of Science and Technology, Shanghai 200237, China

\*E-mail: binbinxu@ecust.edu.cn; slin@ecust.edu.cn

<sup>‡</sup> Both authors contributed equally to this work.

## 1. Simulation Method

Dissipative particle dynamics (DPD) is a coarse-grained mesoscopic simulation approach, which was first introduced by Hoogerbrugge and Koelman and improved by Español and Warren.<sup>1-3</sup> In the DPD model, each bead represents a cluster of atoms or molecules. The movement of DPD beads obeys Newton's equation of motion,

$$\frac{d\mathbf{r}_i}{dt} = \mathbf{v}_i, \quad m \frac{d\mathbf{v}_i}{dt} = \mathbf{f}_i \quad (\text{S1})$$

where  $\mathbf{r}_i$ ,  $\mathbf{v}_i$ ,  $\mathbf{f}_i$ , and  $m$  are the position, velocity, total force, and mass of the  $i$ th bead, respectively. The total force  $\mathbf{f}_i$  exerted on the  $i$ th bead is the sum of a conservative force  $\mathbf{F}_{ij}^C$ , a dissipative force  $\mathbf{F}_{ij}^D$ , a random force  $\mathbf{F}_{ij}^R$ , and a bonding force  $\mathbf{F}_{ij}^S$ , given by

$$\mathbf{f}_i = \sum_{j \neq i} (\mathbf{F}_{ij}^C + \mathbf{F}_{ij}^D + \mathbf{F}_{ij}^R + \mathbf{F}_{ij}^S) \quad (\text{S2})$$

The conservative force is a soft repulsion for nonbonded beads,

$$\mathbf{F}_{ij}^C = a_{ij} \sqrt{\omega^C(r_{ij})} \hat{\mathbf{r}}_{ij} \quad (\text{S3})$$

where  $a_{ij}$  is the maximum repulsive interaction between the  $i$ th and  $j$ th beads;  $\mathbf{r}_{ij} = \mathbf{r}_i - \mathbf{r}_j$ ;  $r_{ij} = |\mathbf{r}_{ij}|$ ;

$\hat{\mathbf{r}}_{ij} = \mathbf{r}_{ij} / r_{ij}$ . The weight function  $\omega^C(r_{ij})$  is given by

$$\omega^C(r_{ij}) = \begin{cases} (1 - r_{ij}/r_c)^2, & (r_{ij} < r_c) \\ 0, & (r_{ij} > r_c) \end{cases} \quad (\text{S4})$$

where  $r_c = 1$  is the cutoff radius. The dissipative force, a friction force acting on the relative velocities of the beads, is

$$\mathbf{F}_{ij}^D = -\gamma \omega^D(r_{ij}) (\hat{\mathbf{r}}_{ij} \cdot \mathbf{v}_{ij}) \hat{\mathbf{r}}_{ij} \quad (\text{S5})$$

where  $\mathbf{v}_{ij} = \mathbf{v}_i - \mathbf{v}_j$ ;  $\gamma$  is the friction coefficient;  $\omega^D(r_{ij})$  is weight functions describing the range of dissipative. The random force, which compensates for the loss of kinetic energy due to the dissipative

force, is given as

$$\mathbf{F}_{ij}^R = \mu \omega^R(r_{ij}) \Gamma_{ij} \Delta t^{-1/2} \hat{\mathbf{r}}_{ij} \quad (\text{S6})$$

where  $\mu$  is the noise amplitude;  $\omega^R(r_{ij})$  is random forces vanishing at  $r = r_c$ , respectively.  $\Gamma_{ij}$  is a randomly fluctuating variable with Gaussian statistics, that satisfies

$$\langle \Gamma_{ij}(t) \rangle = 0, \quad \langle \Gamma_{ij}(t) \Gamma_{kl}(t') \rangle = (\delta_{ik} \delta_{jl} + \delta_{il} \delta_{jk}) \delta(t - t') \quad (\text{S7})$$

Only one of  $\omega^D(r_{ij})$  or  $\omega^R(r_{ij})$  can be chosen arbitrarily to satisfy the fluctuation-dissipation theorem and the equilibrium Gibbs-Boltzmann distribution. They are determined by the relation as follows.

$$\omega^D(r_{ij}) = [\omega^R(r_{ij})]^2 = \omega^C(r_{ij}) \quad (\text{S8})$$

The values of parameters  $\gamma$  and  $\mu$  are coupled by

$$\mu^2 = 2\gamma k_B T \Delta t \quad (\text{S9})$$

where  $T$  is the absolute temperature and  $k_B$  is the Boltzmann constant. Here,  $k_B T$  and  $\gamma$  are chosen to be 1.0 and 4.5, respectively.

For the polymer system, the interaction force between bonded beads is described by a harmonic spring force,

$$\mathbf{F}_{ij}^S = k_S (1 - r_{ij} / r_{eq}) \hat{\mathbf{r}}_{ij} \quad (\text{S10})$$

where  $k_S$  is the spring constant, and  $r_{eq}$  is the bond equilibrium length. We chose  $k_S = 100$  and  $r_{eq} = 0.86$ .

The angle force is added between every two consecutive bonds to guarantee the rigidity of rigid blocks.

The angle force  $\mathbf{F}^A$  is given by

$$\mathbf{F}^A = -\nabla \left[ k_A (\pi - \theta)^2 \right] \quad (\text{S11})$$

where  $k_A$  is the angle constant and  $\theta$  is the bond angle. The  $k_A$  was set to 80 to ensure the rigidity of the rod blocks. In the DPD method, reduced units are adopted for all physical quantities, including the

cutoff radius  $r_c$ , the bead mass  $m$ , and the temperature  $k_B T$ . The time unit  $\tau$  can be formulated by

$$\tau = \sqrt{mr_c^2 / k_B T} \quad (\text{S12})$$

## 2. Formation Kinetics of Nanowires

To understand the polymerization process for the self-assembly of ADMBs, we propose a theoretical model to predict the growth of nanowires. The consumption of copolymer chains obeys the following rate equation

$$\frac{dC}{dt} = -kC^2 \quad (\text{S13})$$

where  $C$  is the concentration of copolymer chains. Unlike Flory's classic model, where the rate coefficient  $k$  is assumed to be constant during the overall polymerization process, our modified model assumes the fact that the mobility of building units depends upon their size. Namely, the variation of rate coefficient  $k$  can be estimated by the average number  $\langle X \rangle_n$  of copolymer chains in the nanowires and the exponential factor  $\alpha$  (*i.e.*,  $k = k_0 / \langle X \rangle_n^\alpha$ ).<sup>4-6</sup> Here,  $k_0$  is the rate constant, and  $\langle X \rangle_n = C_0 / C$ , where  $C_0$  is the initial concentration of copolymer chains. As a special case, the exponential factor  $\alpha = 0$  refers to the classic Flory model. Substituting these variables into Eq. (S13) yields the analytic expressions of relevant variables as follows

$$\langle X(t) \rangle_n^{\alpha+1} = Kt + 1 \quad (\text{S14})$$

$$C_m(t) = \frac{C_0}{[Kt + 1]^{\frac{2}{\alpha+1}}} \quad (\text{S15})$$

$$C_p(t) = \frac{C_0 \left[ (Kt + 1)^{\frac{2}{\alpha+1}} - 1 \right]}{[Kt + 1]^{\frac{2}{\alpha+1}}} \quad (\text{S16})$$

$$\text{PDI}(t) = 2 - \frac{1}{[Kt + 1]^{\frac{1}{\alpha+1}}} \quad (\text{S17})$$

where  $K = (\alpha + 1)k_0C_0$  is the growth rate of nanowires;  $C_m$  is the concentration of free copolymer chains, and  $C_p$  is the concentration of nanowires; PDI is the polydispersity index of nanowires.

### 3. Self-Assembly Dynamics of Nanowires with Different Rigid C Chains

Fig. S1 shows the relationship between the number-average polymerization degree ( $X_n$ ) of the aggregates and time ( $t$ ) for different lengths of rod C chains. As shown, in a short period of time, the  $X_n$  of the assemblies changes little with increasing length of the C chains. However, as the length of the C chains increases, the exponential factor  $\alpha$  gradually increases, causing the  $X_n$  of the assemblies to decrease as the C chain length increases over a long period of time. This process is similar to the growth of the A side chains, indicating that increasing the length of either the solvophilic or solvophobic side chains will hinder the movement of the aggregates.

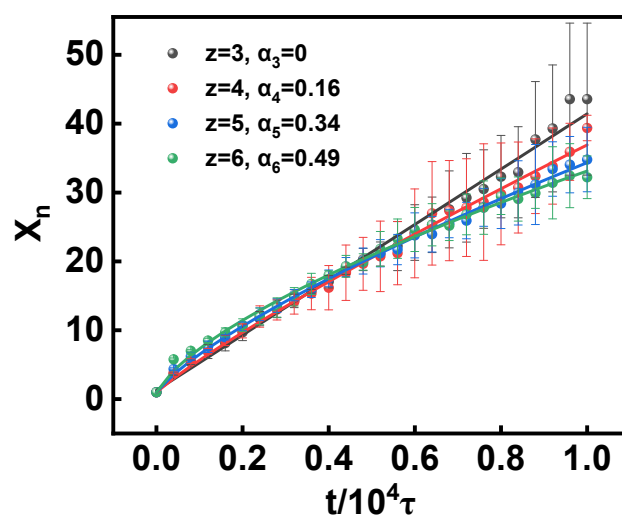

**Fig. S1.** Variation in the number-average polymerization degree ( $X_n$ ) of the aggregates during the simulation of  $(M_5-g-A_3/B_4)-b-(M_5-g-C_z)$  for different rod C branch lengths.

#### 4. Orientational Arrangement of Rigid Side Chains

We used the order parameter  $S$  to evaluate the orientational arrangement of rod side chains in self-assembled aggregates. The order parameter  $S$  is defined as<sup>7</sup>

$$S_i = \frac{3(\mathbf{u}_i \cdot \mathbf{u}_d)^2 - 1}{2} \quad (\text{S18})$$

where  $\mathbf{u}_i$  and  $\mathbf{u}_d$  represent the normalized vector of the  $i$ th rod chains and the director, respectively.

The  $\mathbf{u}_d$  is calculated by iteration to find the maximum value of  $\sum_{i=1}^N (\mathbf{u}_i \cdot \mathbf{u}_d)^2$ . However, traditional order parameters cannot reveal the collection of rigid chains in the structures, such as a vesicular wall.

The local order parameter, the average over the order parameter of every rigid chain with neighboring rigid chains, can describe the arrangement of rigid chains in a vesicular wall. As illustrated in Fig. S2, the neighboring domain is defined by a cylindrical domain centered at a rigid chain. The cylindrical domain possesses radius  $R$  and length  $L$ , where  $R$  and  $L$  are chosen to be  $2.0 r_c$  and  $4.0 r_c$ , respectively. The rigid chain with one or more beads located in this cylindrical domain is categorized as the neighboring rigid chain. This local order parameter derives from the short-ranged order parameter used in the study carried out by Sheng et al.<sup>8</sup> In their study, the  $R$  and  $L$  were related to the length  $L_{\text{rod}}$  of the rigid chain ( $L = L_{\text{rod}}$  and  $R = \frac{L_{\text{rod}}}{2\sqrt{3}}$ ). Because of the relatively small cylindrical area for short  $L_{\text{rod}}$ , we found that this short-range order parameter would result in an irrational increment with short rigid chains. Consequently, we fixed the values of  $R$  and  $L$  to obtain the local order parameter.

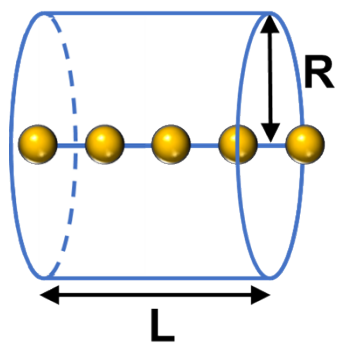

**Fig. S2.** Schematic of the neighboring cylindrical domain centered at a rigid chain.



## Reference

1. P. J. Hoogerbrugge and J. M. V. A. Koelman, Simulating microscopic hydrodynamic phenomena with dissipative particle dynamics. *Europhys. Lett.*, 1992, **19**, 155-160.
2. R. D. Groot and P. B. Warren, Dissipative particle dynamics: bridging the gap between atomistic and mesoscopic simulation. *J. Chem. Phys.*, 1997, **107**, 4423-4435.
3. A. Maiti and S. McGrother, Bead-bead interaction parameters in dissipative particle dynamics: Relation to bead-size, solubility parameter, and surface tension. *J. Chem. Phys.* 2004, **120**, 1594-1601.
4. M. Doi, Diffusion-controlled reaction of polymers. *Chem. Phys.*, 1975, **9**, 455-466.
5. J. D. Guzmán, R. Pollard and J. D. Schieber, Modeling of diffusion effects on step-growth polymerizations. *Macromolecules*, 2005, **38**, 188-195.
6. Ma, X.; Zhou, Y.; Zhang, L.; Lin, J. Tian, X. Polymerization-like kinetics of the self-assembly of colloidal nanoparticles into supracolloidal polymers. *Nanoscale* 2018, **10**, 16873-16880.
7. Lv, Y.; Wang, L.; Wu, F.; Gong, S.; Wei, J.; Lin, S., Self-assembly and stimuli-responsive behaviours of side-chain liquid crystalline copolymers: a dissipative particle dynamics simulation approach. *Phys. Chem. Chem. Phys.* 2019, **21**, 7645-7653.
8. Chou, S. H.; Tsao, H. K.; Sheng, Y. J., Structural aggregates of rod-coil copolymer solutions. *J. Chem. Phys.* 2011, **134**, 034904.
